# Supplementary material
Source: PubMed Central journal article supplement (PMC3152594)
Supplement: NIHMS306066-supplement-01.pdf [file NIHMS306066-supplement-01.pdf]

Supplementary Table. WNV isolates analyzed in this study.

| Genbank accession no. | Strain ID           | Geographic origin       | Host                            | Collection date |
|-----------------------|---------------------|-------------------------|---------------------------------|-----------------|
| AF481864              | IS-98 ST1           | Israel                  | Stork                           | 1998            |
| AF206518              | 2741                | Greenwich, Connecticut  | <i>Culex pipiens</i>            | 9/14/1999       |
| HM488127              | BID-V4188           | Stratford, Connecticut  | American Crow                   | 9/24/1999       |
| HM488126              | BID-V4187           | Stratford, Connecticut  | American Crow                   | 9/25/1999       |
| HM488128              | BID-V4189           | Stratford, Connecticut  | American Crow                   | 9/27/1999       |
| AF196835              | NY99 flamingo382-99 | New York                | Flamingo                        | 1999            |
| AF260967              | NY99-eqhs           | New York                | Horse                           | 1999            |
| HM488125              | BID-V4186           | Stratford, Connecticut  | American Crow                   | 9/29/1999       |
| HM488130              | BID-V4192           | Milford, Connecticut    | <i>Culex salinarius</i>         | 9/18/2000       |
| HM488132              | BID-V4194           | Shelton, Connecticut    | <i>Culiseta melanura</i>        | 9/20/2000       |
| HM488129              | BID-V4191           | Milford, Connecticut    | <i>Culex salinarius</i>         | 9/21/2000       |
| HM488131              | BID-V4193           | Milford, Connecticut    | <i>Culex pipiens</i>            | 9/21/2000       |
| AF404756              | NY 2000-crow3356    | New York                | Crow                            | 2000            |
| AF404755              | NY 2000-grouse3282  | New York                | Grouse                          | 2000            |
| AF404754              | NJ 2000 MQ488       | New Jersey              | <i>Culex pipiens</i>            | 2000            |
| AF404753              | MD 2000-crow265     | Maryland                | Crow                            | 2000            |
| HM488133              | BID-V4195           | Stratford, Connecticut  | <i>Culex pipiens</i>            | 7/16/2001       |
| HM488134              | BID-V4198           | Stratford, Connecticut  | <i>Ochlerotatus sollicitans</i> | 9/6/2001        |
| HM488135              | BID-V4199           | Stratford, Connecticut  | <i>Ochlerotatus cantator</i>    | 9/6/2001        |
| HM488136              | BID-V4200           | Stratford, Connecticut  | <i>Culex restuans</i>           | 9/7/2001        |
| DQ164194              | 32010157            | New York                | American Crow                   | 2001            |
| HM488208              | BID-V4204           | Stratford, Connecticut  | <i>Culex salinarius</i>         | 8/19/2002       |
| HM488137              | BID-V4202           | Stratford, Connecticut  | <i>Culex pipiens</i>            | 8/20/2002       |
| HM756648              | BID-V4205           | Stratford, Connecticut  | <i>Ochlerotatus rivittatus</i>  | 9/24/2002       |
| HM488114              | BID-V4102           | Stratford, Connecticut  | <i>Aedes cinereus</i>           | 10/1/2002       |
| AY289214              | TVP 8533            | Texas                   | Human                           | 2002            |
| DQ164200              | 81931               | Indiana                 | Human                           | 2002            |
| DQ164202              | 81948               | Ohio                    | Human                           | 2002            |
| DQ164197              | 68960               | Georgia                 | Human                           | 2002            |
| DQ164196              | 68955               | Georgia                 | Human                           | 2002            |
| DQ164198              | 80025               | Texas                   | Human                           | 2002            |
| DQ164195              | 3402005             | New York                | <i>Culex pipiens/restuans</i>   | 2002            |
| DQ164193              | 02002758            | New York                | American Crow                   | 2002            |
| DQ164187              | 02003557            | New York                | American Crow                   | 2002            |
| DQ164186              | 02003011            | New York                | American Crow                   | 2002            |
| DQ164205              | 80022               | Texas                   | human                           | 2002            |
| HM488171              | BID-V4560           | Redding, Connecticut    | <i>Culex restuans</i>           | 7/8/2003        |
| HM488172              | BID-V4561           | Fairfield, Connecticut  | <i>Ochlerotatus sticticus</i>   | 8/11/2003       |
| HM488173              | BID-V4562           | New Haven, Connecticut  | <i>Culex restuans</i>           | 8/12/2003       |
| HM488174              | BID-V4563           | West Haven, Connecticut | <i>Culex salinarius</i>         | 8/12/2003       |
| HM488140              | BID-V4210           | Stratford, Connecticut  | <i>Aedes vexans</i>             | 8/12/2003       |

|          |                |                           |                                |            |
|----------|----------------|---------------------------|--------------------------------|------------|
| HM488209 | BID-V4564      | Monroe, Connecticut       | <i>Ochlerotatussticticus</i>   | 8/14/2003  |
| HM488210 | BID-V4565      | Bethany, Connecticut      | <i>Culisetamelanura</i>        | 8/18/2003  |
| HM488138 | BID-V4207      | Stratford, Connecticut    | <i>Culexrestuans</i>           | 8/18/2003  |
| HM488175 | BID-V4569      | Glastonbury, Connecticut  | <i>Culexrestuans</i>           | 8/19/2003  |
| HM488212 | BID-V4567      | New Haven, Connecticut    | <i>Culexsalinarius</i>         | 8/19/2003  |
| HM488213 | BID-V4571      | Darien, Connecticut       | <i>Culexrestuans</i>           | 8/20/2003  |
| HM488214 | BID-V4572      | Fairfield, Connecticut    | <i>Culexpiens</i>              | 8/20/2003  |
| HM488215 | BID-V4573      | Fairfield, Connecticut    | <i>Culisetamelanura</i>        | 8/20/2003  |
| HM488176 | BID-V4575      | West Haven, Connecticut   | <i>Culexsalinarius</i>         | 8/20/2003  |
| HM488216 | BID-V4574      | Voluntown, Connecticut    | <i>Culisetamelanura</i>        | 8/20/2003  |
| HM488217 | BID-V4581      | New Haven, Connecticut    | <i>Culexsalinarius</i>         | 8/21/2003  |
| HM756650 | BID-V4582      | New Haven, Connecticut    | <i>Culexsalinarius</i>         | 8/21/2003  |
| HM488218 | BID-V4583      | Danbury, Connecticut      | <i>Culexpiens</i>              | 8/25/2003  |
| HM756651 | BID-V4584      | Norwalk, Connecticut      | <i>Ochlerotatustrivittatus</i> | 8/25/2003  |
| HM488219 | BID-V4585      | Southington, Connecticut  | <i>Culexpiens</i>              | 8/25/2003  |
| HM488220 | BID-V4586      | West Haven, Connecticut   | <i>Culexsalinarius</i>         | 8/25/2003  |
| HM756652 | BID-V4587      | Killingworth, Connecticut | <i>Aedes cinereus</i>          | 8/26/2003  |
| HM756653 | BID-V4588      | Killingworth, Connecticut | <i>Culexpiens</i>              | 8/26/2003  |
| HM488221 | BID-V4593      | Ledyard, Connecticut      | <i>Culisetamelanura</i>        | 9/3/2003   |
| HM756654 | BID-V4598      | Greenwich, Connecticut    | <i>Culexsalinarius</i>         | 9/9/2003   |
| HM488222 | BID-V4599      | Stonington, Connecticut   | <i>Culisetamelanura</i>        | 9/9/2003   |
| HM488223 | BID-V4603      | Fairfield, Connecticut    | <i>Culisetamelanura</i>        | 9/11/2003  |
| HM488224 | BID-V4604      | Fairfield, Connecticut    | <i>Culisetamelanura</i>        | 9/11/2003  |
| HM488225 | BID-V4605      | New Haven, Connecticut    | <i>Aedes cinereus</i>          | 9/15/2003  |
| HM488226 | BID-V4607      | New Haven, Connecticut    | <i>Culexpiens</i>              | 9/15/2003  |
| HM488227 | BID-V4608      | New Haven, Connecticut    | <i>Culexrestuans</i>           | 9/15/2003  |
| HM488228 | BID-V4609      | New Haven, Connecticut    | <i>Culexsalinarius</i>         | 9/15/2003  |
| HM488229 | BID-V4610      | New Haven, Connecticut    | <i>Psorophora ferox</i>        | 9/15/2003  |
| HM488230 | BID-V4612      | Plainfield, Connecticut   | <i>Culexsalinarius</i>         | 9/16/2003  |
| HM488141 | BID-V4212      | Stratford, Connecticut    | <i>Culexpiens</i>              | 9/16/2003  |
| HM488231 | BID-V4613      | Chester, Connecticut      | <i>Culisetamelanura</i>        | 9/17/2003  |
| HM488232 | BID-V4614      | Chester, Connecticut      | <i>Culisetamelanura</i>        | 9/17/2003  |
| HM756656 | BID-V4615      | Ledyard, Connecticut      | <i>Culisetamelanura</i>        | 9/17/2003  |
| HM488233 | BID-V4616      | Meriden, Connecticut      | <i>Aedes vexans</i>            | 9/17/2003  |
| HM488234 | BID-V4617      | Meriden, Connecticut      | <i>Culexsalinarius</i>         | 9/17/2003  |
| HM488235 | BID-V4619      | Darien, Connecticut       | <i>Culisetamelanura</i>        | 9/24/2003  |
| HM756657 | BID-V4685      | Bridgeport, Connecticut   | <i>Culexpiens</i>              | 10/1/2003  |
| HM756658 | BID-V4686      | Stonington, Connecticut   | <i>Culisetamelanura</i>        | 10/7/2003  |
| HM488139 | BID-V4208      | Stratford, Connecticut    | <i>Culexsalinarius</i>         | 10/7/2003  |
| HM756659 | BID-V4687      | Westbrook, Connecticut    | <i>Culisetamelanura</i>        | 10/8/2003  |
| HM488236 | BID-V4700      | Killingworth, Connecticut | <i>Culisetamelanura</i>        | 10/15/2003 |
| AY660002 | TM171-03       | Mexico                    | Raven                          | 2003       |
| AY712948 | Mosquito V4369 | Texas                     | <i>Culex quinquefasciatus</i>  | 2003       |
| AY712947 | Bird 1461      | Texas                     | Blue Jay                       | 2003       |
| AY712946 | Bird 1171      | Texas                     | Blue Jay                       | 2003       |
| AY712945 | Bird 1153      | Texas                     | Mourning Dove                  | 2003       |
| DQ164199 | Texas 82229    | Texas                     | Human                          | 2003       |
| DQ164192 | 03002094       | New York                  | American Crow                  | 2003       |

|          |               |                        |                                |           |
|----------|---------------|------------------------|--------------------------------|-----------|
| DQ164191 | 03002086      | New York               | American Crow                  | 2003      |
| DQ164190 | 03002018      | New York               | American Crow                  | 2003      |
| DQ164189 | 03001986      | New York               | American Crow                  | 2003      |
| DQ164188 | 03000360      | New York               | American Crow                  | 2003      |
| DQ164204 | Colorado 3068 | Colorado               | Red-tailed Hawk                | 2003      |
| DQ164203 | Colorado 3258 | Colorado               | Magpie                         | 2003      |
| DQ983578 | FL03-FL2-3    | Florida                | <i>Culexnigripalpus</i>        | 2003      |
| HM488142 | BID-V4214     | Stratford, Connecticut | <i>Ochlerotatustriseriatus</i> | 7/12/2004 |
| HM488143 | BID-V4215     | Stratford, Connecticut | <i>Aedes cinereus</i>          | 8/9/2004  |
| HM488144 | BID-V4216     | Stratford, Connecticut | <i>Culex restuans</i>          | 8/17/2004 |
| HM488145 | BID-V4217     | Stratford, Connecticut | <i>Aedes vexans</i>            | 8/30/2004 |
| HM488146 | BID-V4218     | Stratford, Connecticut | <i>Psorophora ferox</i>        | 8/30/2004 |
| HM488147 | BID-V4219     | Stratford, Connecticut | <i>Culex salinarius</i>        | 9/13/2004 |
| HM488148 | BID-V4220     | Stratford, Connecticut | <i>Culex pipiens</i>           | 10/4/2004 |
| DQ164201 | Arizona 2004  | Arizona                | Human                          | 2004      |
| DQ164206 | Bird 3588     | Texas                  | Blue Jay                       | 2004      |
| HM488149 | BID-V4223     | Stratford, Connecticut | <i>Ochlerotatus cantator</i>   | 8/1/2005  |
| HM488152 | BID-V4226     | Stratford, Connecticut | <i>Aedes vexans</i>            | 8/16/2005 |
| HM488153 | BID-V4227     | Stratford, Connecticut | <i>Culex pipiens</i>           | 8/16/2005 |
| HM488154 | BID-V4228     | Stratford, Connecticut | <i>Culex pipiens</i>           | 8/16/2005 |
| HM488115 | BID-V4103     | Stratford, Connecticut | <i>Culex salinarius</i>        | 8/22/2005 |
| HM488116 | BID-V4104     | Stratford, Connecticut | <i>Culex pipiens</i> male      | 8/22/2005 |
| HM488117 | BID-V4105     | Stratford, Connecticut | <i>Ochlerotatustriseriatus</i> | 8/22/2005 |
| HM488118 | BID-V4107     | Stratford, Connecticut | <i>Culex pipiens</i> male      | 8/29/2005 |
| HM488119 | BID-V4108     | Stratford, Connecticut | <i>Culex pipiens</i> male      | 9/6/2005  |
| HM488120 | BID-V4109     | Stratford, Connecticut | <i>Culex pipiens</i> male      | 9/6/2005  |
| HM488150 | BID-V4224     | Stratford, Connecticut | <i>Culex pipiens</i>           | 9/6/2005  |
| HM488151 | BID-V4225     | Stratford, Connecticut | <i>Culex pipiens</i>           | 9/6/2005  |
| HM488121 | BID-V4110     | Stratford, Connecticut | <i>Culex pipiens</i>           | 9/25/2005 |
| HM488158 | BID-V4232     | Stratford, Connecticut | <i>Culex pipiens</i>           | 7/31/2006 |
| HM488159 | BID-V4233     | Stratford, Connecticut | <i>Culex salinarius</i>        | 8/14/2006 |
| HM488155 | BID-V4229     | Stratford, Connecticut | <i>Culex restuans</i>          | 8/31/2006 |
| HM756649 | BID-V4354     | Stratford, Connecticut | <i>Culex pipiens</i>           | 9/5/2006  |
| HM488156 | BID-V4230     | Stratford, Connecticut | <i>Culex pipiens</i>           | 9/13/2006 |
| HM488157 | BID-V4231     | Stratford, Connecticut | <i>Culex pipiens</i>           | 9/18/2006 |
| HM488160 | BID-V4355     | Stratford, Connecticut | <i>Culex pipiens</i>           | 9/25/2006 |
| HM488161 | BID-V4356     | Stratford, Connecticut | <i>Culex pipiens</i>           | 8/22/2007 |
| HM488163 | BID-V4359     | Stratford, Connecticut | <i>Culex pipiens</i>           | 8/29/2007 |
| HM488164 | BID-V4360     | Stratford, Connecticut | <i>Culex pipiens</i>           | 8/30/2007 |
| HM488165 | BID-V4361     | Stratford, Connecticut | <i>Culex pipiens</i>           | 8/30/2007 |
| HM488162 | BID-V4357     | Stratford, Connecticut | <i>Culex pipiens</i>           | 9/4/2007  |
| HM488166 | BID-V4362     | Stratford, Connecticut | <i>Culex pipiens</i>           | 9/10/2008 |
| HM488167 | BID-V4363     | Stratford, Connecticut | <i>Culex pipiens</i>           | 9/10/2008 |
| HM488168 | BID-V4364     | Stratford, Connecticut | <i>Culex pipiens</i>           | 9/10/2008 |
| HM488169 | BID-V4365     | Stratford, Connecticut | <i>Culex pipiens</i>           | 9/16/2008 |
| HM488170 | BID-V4366     | Stratford, Connecticut | <i>Culex pipiens</i>           | 9/16/2008 |
